# Supplementary material for: The Evolutionary History of the Rediscovered Austrian Population of the Giant Centipede Scolopendra cingulata Latreille 1829 (Chilopoda, Scolopendromorpha)
Source: PLoS One. 2014 Sep 24;9(9):e108650. doi: 10.1371/journal.pone.0108650 (PMC4177219; doi:10.1371/journal.pone.0108650)
Supplement: Table S2 — Uncorrected p-distances of COI alignment. Computed with Mega5 [42]. (XLS) [file pone.0108650.s002.xls]

## Sheet: MatrixOutput
		1	2	3	4	5	6	7	8	9	10	11	12	13	14	15	16	17	18	19	20	21	22	23	24	25	26	27	28	29
1	*canidens-1
2	*canidens-2	0.0019305
3	*cretica	0.137066	0.135135
4	oraniensis	0.144788	0.144788	0.150579
5	*Greece_Nisyros	0.164093	0.164093	0.140927	0.164093
6	*Greece_Koufonisi	0.148649	0.148649	0.137066	0.140927	0.0694981
7	*Greece_Paros	0.148649	0.148649	0.137066	0.140927	0.0694981	0
8	*Greece_Amorgos	0.144788	0.144788	0.142857	0.148649	0.0830116	0.0617761	0.0617761
9	*Greece_Anafi	0.144788	0.144788	0.144788	0.144788	0.0830116	0.0559846	0.0559846	0.0173745
10	Greece_PortLagos-1	0.146718	0.146718	0.144788	0.144788	0.0617761	0.023166	0.023166	0.0579151	0.0501931
11	Greece_Kavala-1	0.148649	0.148649	0.142857	0.138996	0.0675676	0.00965251	0.00965251	0.0637066	0.0579151	0.0250965
12	Greece_Kavala-2	0.146718	0.146718	0.144788	0.140927	0.0656371	0.011583	0.011583	0.0656371	0.0598456	0.023166	0.0019305
13	Greece_PortLagos-2	0.146718	0.146718	0.144788	0.140927	0.0656371	0.011583	0.011583	0.0656371	0.0598456	0.023166	0.0019305	0
14	Turkey_Izmir	0.167954	0.167954	0.15251	0.158301	0.0637066	0.034749	0.034749	0.0675676	0.0617761	0.0289575	0.0328185	0.0328185	0.0328185
15	Turkey_Troy	0.162162	0.162162	0.146718	0.160232	0.0540541	0.0444015	0.0444015	0.0694981	0.0656371	0.0289575	0.042471	0.0405405	0.0405405	0.023166
16	Romania	0.148649	0.148649	0.146718	0.142857	0.0714286	0.0250965	0.0250965	0.0637066	0.0579151	0.0250965	0.023166	0.0212355	0.0212355	0.046332	0.0501931
17	Hungary-1	0.15251	0.15251	0.146718	0.135135	0.0694981	0.0405405	0.0405405	0.0714286	0.0675676	0.0366795	0.042471	0.0405405	0.0405405	0.046332	0.0482625	0.0482625
18	Hungary-2	0.15444	0.15444	0.150579	0.137066	0.0772201	0.0444015	0.0444015	0.0752896	0.0714286	0.0405405	0.046332	0.0444015	0.0444015	0.0501931	0.0521236	0.0521236	0.00772201
19	Hungary-3	0.150579	0.150579	0.148649	0.137066	0.0752896	0.03861	0.03861	0.0694981	0.0656371	0.034749	0.0405405	0.03861	0.03861	0.0444015	0.0482625	0.046332	0.00579151	0.00965251
20	France	0.160232	0.160232	0.160232	0.15251	0.0907336	0.0637066	0.0637066	0.0849421	0.0772201	0.0656371	0.0656371	0.0675676	0.0675676	0.0752896	0.0772201	0.0733591	0.0598456	0.0675676	0.0656371
21	Austria-1	0.148649	0.148649	0.138996	0.138996	0.0598456	0.0250965	0.0250965	0.0598456	0.0579151	0.0212355	0.0250965	0.023166	0.023166	0.030888	0.034749	0.0289575	0.0405405	0.0482625	0.042471	0.0579151
22	Austria-2	0.148649	0.148649	0.138996	0.138996	0.0598456	0.0250965	0.0250965	0.0598456	0.0579151	0.0212355	0.0250965	0.023166	0.023166	0.030888	0.034749	0.0289575	0.0405405	0.0482625	0.042471	0.0579151	0
23	Austria-3	0.148649	0.148649	0.138996	0.138996	0.0598456	0.0250965	0.0250965	0.0598456	0.0579151	0.0212355	0.0250965	0.023166	0.023166	0.030888	0.034749	0.0289575	0.0405405	0.0482625	0.042471	0.0579151	0	0
24	Austria-4	0.148649	0.148649	0.138996	0.138996	0.0598456	0.0250965	0.0250965	0.0598456	0.0579151	0.0212355	0.0250965	0.023166	0.023166	0.030888	0.034749	0.0289575	0.0405405	0.0482625	0.042471	0.0579151	0	0	0
25	Austria-5	0.148649	0.148649	0.138996	0.138996	0.0598456	0.0250965	0.0250965	0.0598456	0.0579151	0.0212355	0.0250965	0.023166	0.023166	0.030888	0.034749	0.0289575	0.0405405	0.0482625	0.042471	0.0579151	0	0	0	0
26	Austria-6	0.148649	0.148649	0.138996	0.138996	0.0598456	0.0250965	0.0250965	0.0598456	0.0579151	0.0212355	0.0250965	0.023166	0.023166	0.030888	0.034749	0.0289575	0.0405405	0.0482625	0.042471	0.0579151	0	0	0	0	0
27	Austria-7	0.148649	0.148649	0.138996	0.138996	0.0598456	0.0250965	0.0250965	0.0598456	0.0579151	0.0212355	0.0250965	0.023166	0.023166	0.030888	0.034749	0.0289575	0.0405405	0.0482625	0.042471	0.0579151	0	0	0	0	0	0
28	Austria-8	0.148649	0.148649	0.138996	0.138996	0.0598456	0.0250965	0.0250965	0.0598456	0.0579151	0.0212355	0.0250965	0.023166	0.023166	0.030888	0.034749	0.0289575	0.0405405	0.0482625	0.042471	0.0579151	0	0	0	0	0	0	0
29	Austria-9	0.148649	0.148649	0.138996	0.138996	0.0598456	0.0250965	0.0250965	0.0598456	0.0579151	0.0212355	0.0250965	0.023166	0.023166	0.030888	0.034749	0.0289575	0.0405405	0.0482625	0.042471	0.0579151	0	0	0	0	0	0	0	0
30	Austria-10	0.148649	0.148649	0.138996	0.138996	0.0598456	0.0250965	0.0250965	0.0598456	0.0579151	0.0212355	0.0250965	0.023166	0.023166	0.030888	0.034749	0.0289575	0.0405405	0.0482625	0.042471	0.0579151	0	0	0	0	0	0	0	0	0

## Sheet: Caption
Table. Estimates of Evolutionary Divergence between Sequences
The number of base differences per site from between sequences are shown. The analysis involved 30 nucleotide sequences. Codon positions included were 1st+2nd+3rd+Noncoding. All positions containing gaps and missing data were eliminated. There were a total of 518 positions in the final dataset. Evolutionary analyses were conducted in MEGA5 [1].
1. Tamura K., Peterson D., Peterson N., Stecher G., Nei M., and Kumar S. (2011). MEGA5: Molecular Evolutionary Genetics Analysis using Maximum Likelihood, Evolutionary Distance, and Maximum Parsimony Methods. Molecular Biology and Evolution 28: 2731-2739.
Disclaimer: Although utmost care has been taken to ensure the correctness of the caption, the caption text is provided "as is" without any warranty of any kind. Authors advise the user to carefully check the caption prior to its use for any purpose and report any errors or problems to the authors immediately (www.megasoftware.net). In no event shall the authors and their employers be liable for a…
